# Supplementary material for: SUMOylation and calcium control syntaxin-1A and secretagogin sequestration by tomosyn to regulate insulin exocytosis in human ß cells
Source: PubMed Central journal article supplement (PMC5428262; doi:10.1038/s41598-017-00344-z), 2017-03-21

**Supplementary Information for:**

**SUMOylation and calcium control syntaxin-1A and secretagogin sequestration by tomosyn to regulate insulin exocytosis in human  $\beta$  cells.**

Mourad Ferdaoussi\*, Jianyang Fu, Xiaoqing Dai, Jocelyn E. Manning Fox, Kunimasa Suzuki, Nancy Smith, Gregory Plummer, Patrick E. MacDonald\*.

Alberta Diabetes Institute and Department of Pharmacology, University of Alberta, Edmonton, Alberta, Canada, T6G 2R3.

**Supplemental Experimental Procedures.**

**Reagents.** All chemical reagents were from Sigma Aldrich (Oakville, ON, Canada), except NaCl, HEPES and NaHCO<sub>3</sub> were from Fisher Scientific (Ottawa, Ontario, Canada), and EGTA and EDTA from EMD Millipore (Etobicoke, ON, Canada). Scramble siRNA (SiScr; #4390846) and siRNA directed against Human and rat secretagogin (SiScgn; s20791 and s157840, respectively) were from ThermoFisher Scientific (Rockford, IL, USA). To identify transfected cells in patch-clamp experiments, cells were co-transfected with a fluorescent siRNA (Cat# 1027284,, Qiagen, Toronto, Canada). Goat GFP antiserum was from Eusera (cat #EU3). Mouse anti-tomosyn was from BD Biosciences (cat #611296, Mississauga, ON, Canada). Mouse anti-Syntaxin1 (cat #sc-12736), anti-SUMO1 (cat #sc-5308), and normal mouse (cat #sc-2025) and goat IgG (cat #sc-2028) were from Santa Cruz biotechnology (Dallas, TX, USA). Rabbit anti-secretagogin was from ABCAM (cat #ab137017, Toronto, ON, Canada). Protein G was from GE Healthcare Life Sciences (cat # 17-0618-01, Mississauga, ON, Canada). His-tag antibody (cat # MA1-21315), Fura 2-AM (cat # F1221) and Tris were from Thermo Fisher Scientific.

**LC MS/MS analysis.** INS 832/13 cells cultured in regular media with 11.1 mM glucose were harvested and tomosyn was pulled down as indicated. Immunoprecipitated proteins were eluted in 3X laemmeli buffer and separated using SDS-PAGE. Gels were stained with coomassie blue, and 5 prominent bands located between 75 and 25 KDa were

excised and sequenced separately by the Alberta Proteomics and Mass Spectrometry Facility.

**Quantitative PCR (qPCR).** RNA was isolated from human islets and INS 832/13 cells using Trizol according to manufacturer's protocol. cDNA was synthesized using the 5X All-In-One RT MasterMix (ABM, Richmond, BC) and qPCR was performed using the SYBR master mix (ThermoFisher Scientific) using the following primers. Human Scgn: forward, 5'-CACCATGGATTCTGGCTCTT-3', and reverse, 5'-CTTCCAGGGC TCCTGTTTTA-3'; human  $\beta$ -actin: forward, 5'-GGACTTCGAGCAAGAGATGG-3', and reverse, 5'-AGCACTGTGTTGGCGTACAG-3'; human TBP: forward, 5'-GAACCACGG CACTGATTTTC-3', and reverse, 5'-GCTGGAAAACCCAACTTCTG-3'; rat Scgn: forward, 5'-TTGTTCTTTTCGCCTGGAAAC-3', and reverse, 5'-TGGTGGAGGAAAAG ATCTCG-3'; rat actin: forward, 5'-TGAAGTGTGACGTTGACATCC -3 and reverse, 5'-ACAGTGAGGCCAGGATAGAGC-3.

**TAT-Hisx6-SUMO1 cloning, production, purification.** The pTAT-T7-SUMO1 expression vector, which is a parental plasmid of pTAT-Hisx6-SUMO1, was prepared by inserting SUMO1 cDNA between BamH-I and Not-I of pTAT-CRE (gift from Steven Dowdy, Addgene plasmid # 35619). Double stranded oligonucleotide encoding Hisx6 tag was inserted between Nde-I and BamH-I of pTAT-T7-SUMO1. The recombinant TAT-Hisx6-SUMO1 protein was expressed in Rosetta (DE3)pLysS (Novagen-EMD Millipore, MA, USA) using 0.5 mM IPTG for the induction. The E.coli pellet-containing TAT-Hisx6-SUMO1 was homogenized in 6 M guanidine HCl, 0.1 M sodium acetate, pH 4

using a ULTRA-TURRAX homogenizer (IKA Inc., NC, USA). Total protein was precipitated by addition of 3 volumes of water, 40% methanol and 10% chloroform. Protein pellet was dissolved in 6 M guanidine HCl, 25 mM Tris, 0.5% Triton X-100, pH 8 and then loaded onto a nickel-NTA column (1 x 3 cm, QIAGEN, Hilden, GmbH). After washing the column with sample buffer, TAT-Hisx6-SUMO1 was eluted with 6 M guanidine HCl, 0.1 M imidazole, pH 8. Recombinant TAT-Hisx6-SUMO1 was reduced with 50 mM of DTT at room temperature overnight, and then dialyzed against PBS. INS 832/13 cells were treated with 1  $\mu$ M of TAT-Hisx6-SUMO1 peptide for 6 and 24 hours for Fig S1d, and 16 hours for Fig 1d.

**References:**

Zhao, Q., Xie, Y., Zheng, Y., Jiang, S., Liu, W., Mu, W., Liu, Z., Zhao, Y., Xue, Y., Ren, J., 2014. GPS-SUMO: a tool for the prediction of sumoylation sites and SUMO-interaction motifs. *Nucleic Acids Res.* 42, W325–30.

**Supplemental Figure Legends.****Figure S1 related to Figure 1:**

**a:** Pull-down of native tomosyn demonstrates the co-immunoprecipitation of SUMO1 in human islets (representative of n=4).

**b:** Domain diagram of Syntaxin1A showed the putative SUMO-interacting domains (SIM),  $\alpha$ -helices domains (HA, HB, and HC), SNARE motif (SNARE), and the transmembrane domain (TMR).

**c:** *In silico* analysis of the putative SUMOylation site (yellow boxes) of human and rodent tomosyn1 (STXB5) and tomosyn2 (STB5L) using the GPS-SUMO prediction tool (<http://sumosp.biocuckoo.org/online.php>, (Zhao et al., 2014)).

**d:** The SUMOylation of the cytoplasmic and nuclear target proteins of INS 832/13 cells increases after treatment with recombinant TAT-Hisx6-SUMO1.

**e:** Co-immunoprecipitation of protein lysates from INS 832/13 cells expressing GFP-tomosyn1. The interaction of SNAP25 was not altered by the K298R and K847R mutations (representative of n=4).

**Figure S2 related to Figure 2:**

**a:** The stimulation of INS 832/13 cells with 30 mM KCl for 15 minutes reduces the tomosyn and syntaxin 1 interaction (representative of n=3).

**b:** Secretagogen is expressed in  $\beta$ - and  $\alpha$ -cells as shown by immunostaining of mouse pancreatic sections for secretagogen (red) and insulin (green, *top*) or glucagon (green, *bottom*) (representative of pancreatic sections from 3 mice).

**c and d:** The secretagogen mRNA levels normalized to TBP (**c**) or  $\beta$ -actin (**d**) are similar in islets from T2D and non-diabetic donors. **e-h:** Correlation of secretagogen mRNA levels normalized to TBP (**e and g**) or  $\beta$ -actin (**f and h**) with HbA1c (**e and f**) or BMI (**f and h**). **I:** Secretagogen protein levels measured by immunohistochemistry were similar in islets from T2D and non-diabetic donors. Values are mean  $\pm$  SEM (n =3-9).

**j:** Insulin content was not altered in INS 832/13 cells transiently transfected with SiScgn (n=3).

**k:** Domain diagram of secretagogen showing the calcium binding domains (CB), and the absence of SIM domain.

**Table S1 related to Figure 1:** Tomosyn1-interacting protein identified by immunoprecipitation coupled to MS-MS LC proteomic sequencing. See attached Excel file.

**Table S2 related to Figures 1-4:** Human islet donor information.

**Table S2 related to Figures 1-4:** Human islet donor information. Donors beginning with “R” were processed by the Alberta Diabetes IsletCore, and donors beginning with “H” were processed by the Clinical Islet Laboratory at the University of Alberta.

| Donor ID | Age (years) | Sex | BMI  | HbA1c (if known) | T2D, y/n (years, if known) | T2D medication (if known) |
|----------|-------------|-----|------|------------------|----------------------------|---------------------------|
| R022     | 48          | F   | 18.0 |                  | N                          |                           |
| R023     | 65          | M   | 29.3 | 8.3              | Y                          |                           |
| R024     | 52          | F   | 29.0 |                  | Y                          |                           |
| R030     | 80          | F   | 21.9 |                  | N                          |                           |
| R031     | 54          | M   | 30.0 | 7.2              | Y                          |                           |
| R045     | 27          | F   | 19.5 | 5.2              | N                          |                           |
| R054     | 73          | F   | 22.4 | 6.1              | Y (5 yrs)                  |                           |
| R057     | 53          | F   | 35.5 | 10.3             | Y (20 yrs)                 | Metformin                 |
| R063     | 57          | F   | 23.0 | 6.1              | Y (2 yrs)                  |                           |
| R064     | 36          | M   | 28.1 | 10.9             | Y (1.5 yrs)                |                           |
| R086     | 45          | M   | 23.8 | 7.4              | Y (2.5 yrs)                |                           |
| R088     | 20          | M   | 40.9 | 5.8              | N                          |                           |
| R107     | 56          | F   | 27.5 | 9.3              | Y                          |                           |
| R109     | 60          | F   | 25.0 | 6.1              | N                          |                           |
| R110     | 41          | M   | 26.8 | 9.3              | Y (2 yrs)                  | Metformin                 |
| H1557    | 27          | F   | 21.6 | 5.8              | N                          |                           |
| H1621    | 27          | M   | 35.0 | 5.8              | N                          |                           |
| H1687    | 21          | M   | 23.2 |                  | N                          |                           |

**Figure S1**

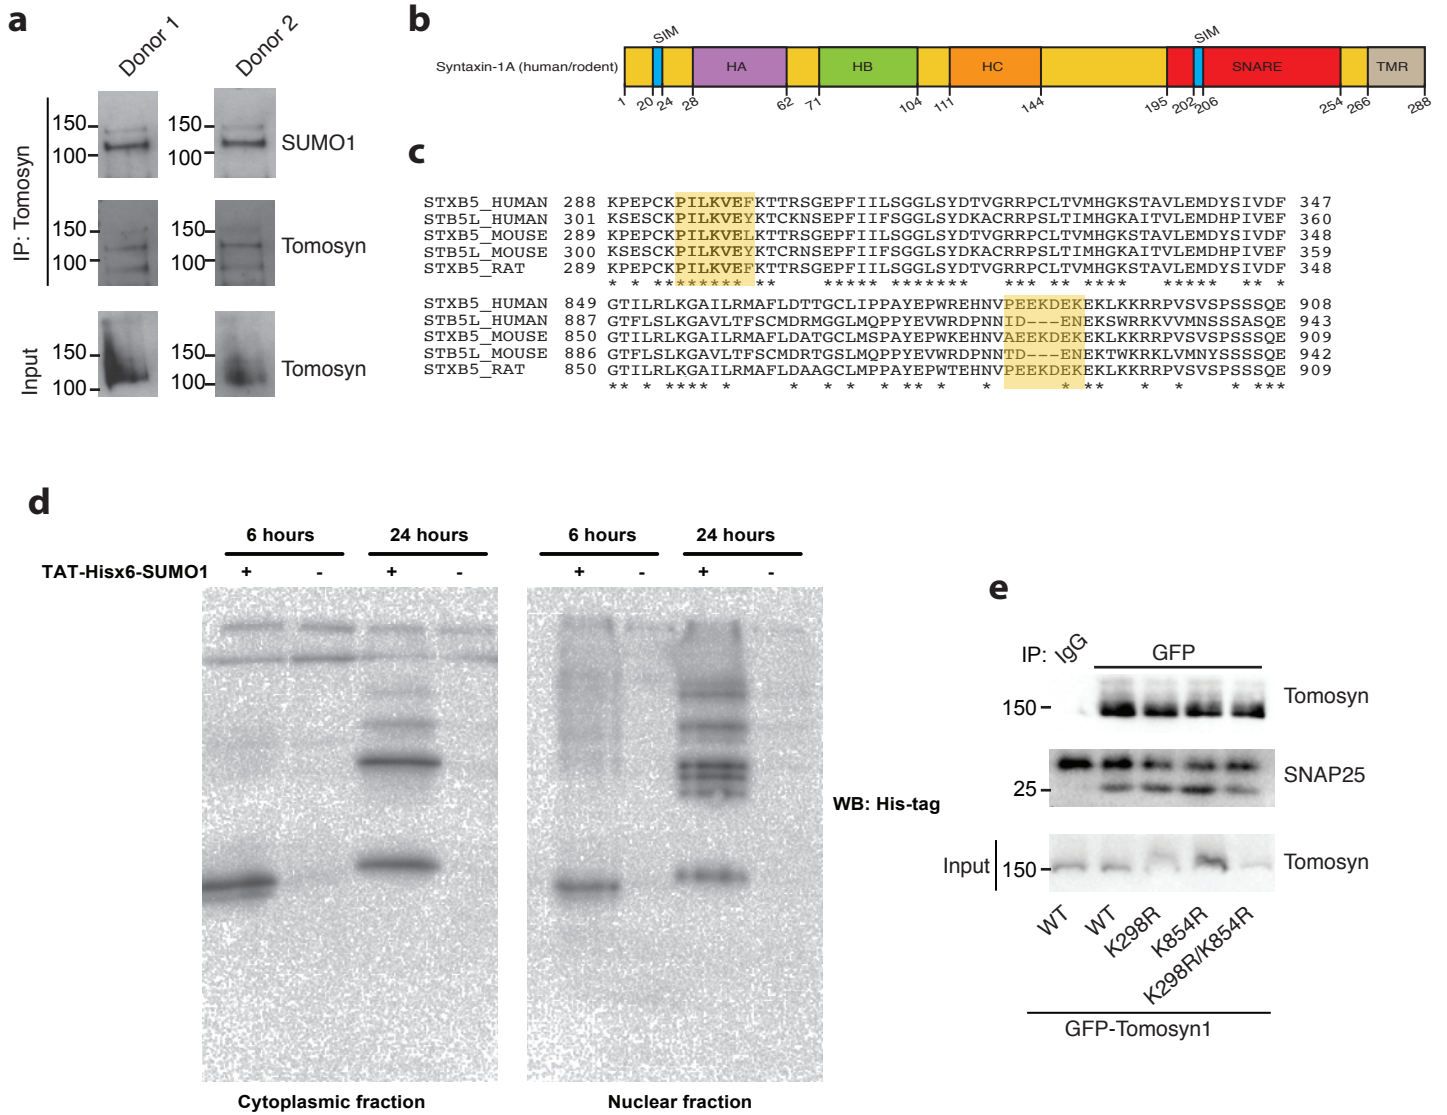



**Figure S2**

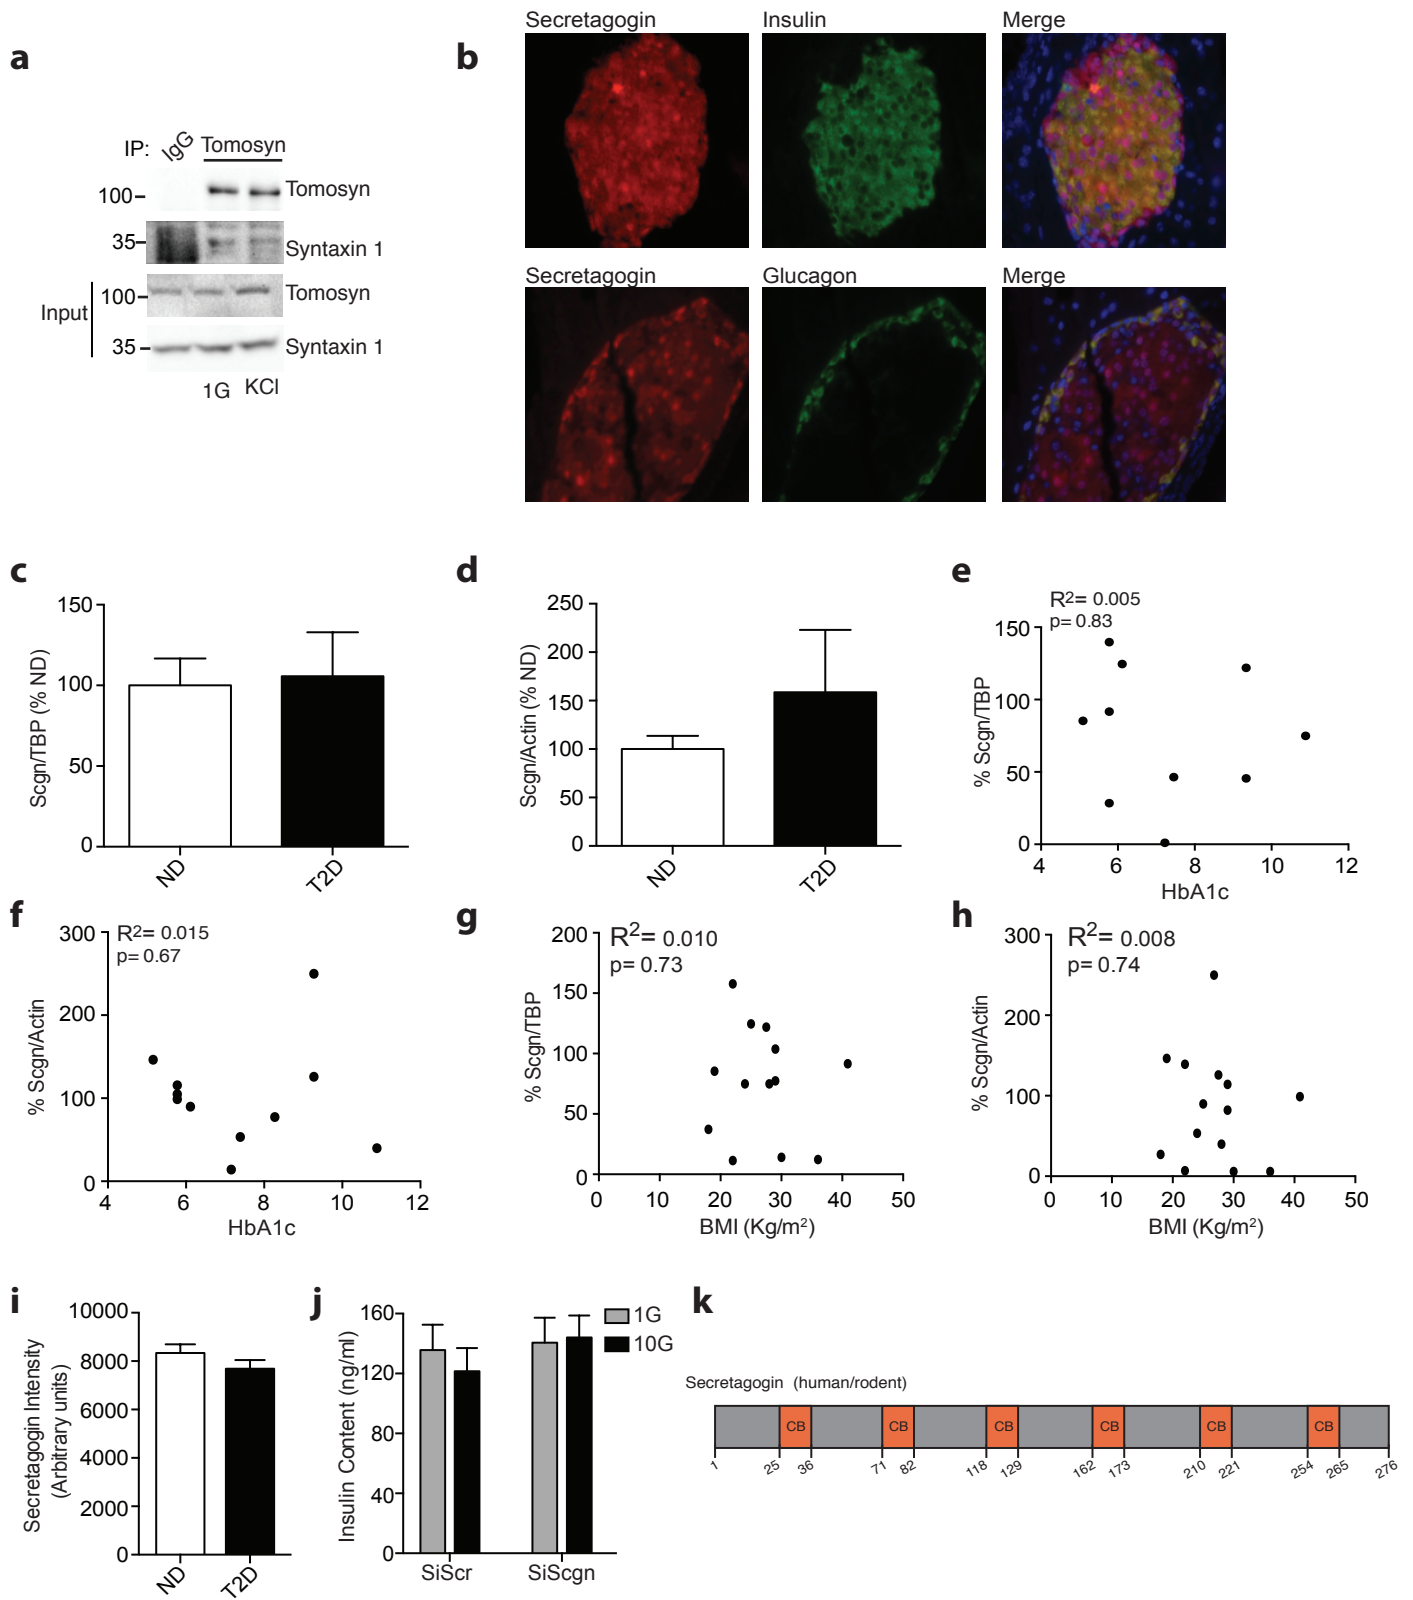

Supplement: 41598_2017_344_MOESM1_ESM.pdf [file 41598_2017_344_MOESM1_ESM.pdf]
